# Supplementary material
Source: PubMed Central journal article supplement (PMC4810642)
Supplement: JVI.02737-15_zjv999091412so1.pdf [file JVI.02737-15_zjv999091412so1.pdf]

**Table S1**

|            | Total Reads | Human              | Called peaks | DHS filter |
|------------|-------------|--------------------|--------------|------------|
| EBNA3A     | 59,941,027  | 8,832,593<br>(15%) | 1640         | 1064       |
| EBNA3B     | 71,646,718  | 6,989,005<br>(10%) | 3033         | 2648       |
| EBNA3C     | 105,734,958 | 8,639,412<br>(8 %) | 3588         | 1802       |
| *EBNA2     | 12,947,095  | 4,883,146<br>(34%) | 8592         | 7772       |
| RBPJ Rep1  | 125,720,183 | 4,577,382<br>(36%) | 4225         | 3329       |
| *RBPJ Rep2 | 13,382,267  | 7,284,453<br>(54%) | 8348         | 7526       |
| RBPJ total |             |                    | 9938         | 8294       |

**Table S1: Summary of ChIP-seq read alignment and peak calling.**

For each ChIP-seq experiment, total reads, total reads aligned to human genome, and number of called peaks are indicated. Two of these datasets (indicated with an \*) have been previously reported (42), but are reanalyzed here for comparison. The peaks called from initial data processing are further filtered based on their overlapping with the DNase hypersensitivity site (DHS) reported from ENCODE project.

Figure S1

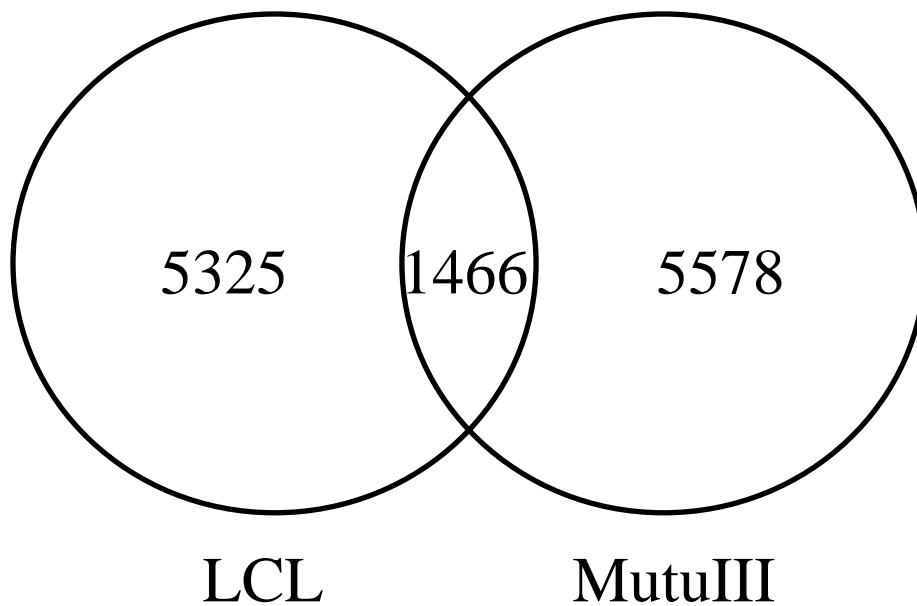

**Figure S1: Overlap of EBNA3 binding peaks with previously published data.**

Overlap between the 6791 EBNA3A, EBNA3B and EBNA3C bound sites (Table S2) identified by our ChIP-seq experiments (LCL) and the 7044 EBNA3 sites identified in MutuIII cells (33) is 1466 as indicated. Overlap was defined as sharing one or more 200 bp genomic bin.

# Table S3

| Gene     | Primer sequence              |                             |
|----------|------------------------------|-----------------------------|
| HDAC7    | P1:CGAACCTGTCACTCCCAGAC      | P2:CCCATTCCAAGGAGCCTAGC     |
| EIF2AK3  | P1:CTTCCGGACGCAATTACCAATGAG  | P2:GTAGGAAAGGTATTCGGGAACTG  |
| METTL13  | P1:AAAGCGTTTtaggtgtctgCGACG  | P2:TCAGCTAGTCATTGGTCGCTGCTT |
| C20orf24 | P1:ACCGTTCTACCAAGATTGTCCCTC  | P2:AAGCCATCCGAGTGAAACAGCGA  |
| IL6R     | P1:CAGTTGAGTCTGTGGGAACTC     | P2:CCTGTTCTCTTGCTCCTAATG    |
| QSK      | P1:GCTGTAGCAGGCAATACTCTCTTG  | P2:GCAGCTGACTTTACATTGGGCAGA |
| HNRPLL   | P1:GAACTGGGAAACCAAAAGAGCGGT  | P2:GATGGCTTCCAGACTGTGGT     |
| NFATC2   | P1:CGCACAGCAGCCCAAATTAC      | P2:ACCTGTCACCCCAATTAGCAG    |
| ALOXE3   | P1:CCGGATAGCTCAGTCGGTAG      | P2:GCGGTACCCAAAAGCAAAGA     |
| POU2F1   | P1:TCTGGCGGCAGGAGAAA         | P2:TGGCCCTTCGGTAGCTAAA      |
| PIP5K1B  | P1:AATGGGAATCCTAGGTCCCTGACT  | P2:AGCTCCAGGTCTAGCTCCATCTTC |
| CTLA4    | P1:CGTTGCAATAACATGGGGCAG     | P2:GCATTCTGCCAGCCTAATCT     |
| CXCR5    | P1:CACCACCCAGAAGACATGAA      | P2:GCAAGGTGCTCTGGAAACTA     |
| CCDC80   | P1:TCTACCTCATGCTGCCCAAACCTGT | P2:TTACCTCCTCTGTGGCTGCATTG  |
| ARHGAP25 | P1:AGACAAGGGTAGTGGATGTTGCCT  | P2:AGCATCACAGTAGCCACAGAACCT |
| JAK1     | P1:TTCCTGCTTTGCACTTCAGCTCAG  | P2:TGCTTCCCTCCCAAATACACCTCA |
| SHQ1     | P1:GGTTTCATTTCTCTGCCCAAACC   | P2:GTCCTCTGTGATCAATTGTGGGCT |
| ROCK1    | P1:ACCTAACAGAGTACAACCTGTC    | P2:CCTCCTGAGAGTGCTTCTGTC    |
| SYTL3    | P1:ATCCTGGTGACTGCAGCCCCTT    | P2:CCAGCGGAGGCCCTGCTATAC    |
| BLK      | P1:AAGGCACATGGAAGGAGAGCTGAA  | P2:ACTAGACCCTAGCTCTGAAACGCC |
| BACH2    | P1:AGCAGTAGTAGCAGTAGTAGCA    | P2:ACCCAAACAGTGGTTCATAGAG   |
| CDH1     | P1:CAAAGGGAAACCCTGTCTCTAC    | P2:TCCTGGACTCAAGGGATCTAC    |
| CACNB4   | P1:GTGGATGTCTTAGCAGTGATGA    | P2:CTAGTGTGGATTGGCTCTGAAT   |
| GSG2     | P1:TTGCCCTGGTACAGGATAGT      | P2:CCTGCTTGGTTTCATTGGTTTC   |
| TMEM109  | P1:AGCCACATTGGCCTTTCA        | P2:ACATTGGAGGGTTTGAGACAG    |
| SUB1     | P1:GCAAAGAAGGGCAAGTCAAAG     | P2:GCATCCTGTCCAATCTCATAGG   |
| FOXO3    | P1:GAAGCACGCATGTGCATTA       | P2:TTATGCACACATGACTAGGAGAC  |
| ALPK2    | P1:CTAGGAGTAAGCCCAACATAGTG   | P2:CAGAGGGTCAGAGAAGCTAAAG   |
| PARP9    | P1:TGTCTGGCACCTTCTGTTAAG     | P2:ACTGCCTTGAGGCAATTCA      |
| TRIB2    | P1:CATCTTGGCGACCATGGTATAG    | P2:ACAAGGCATGCTATCTCTTTCA   |
| PPIA     | P1:GGGCCGAACGTGGTATAA        | P2:CCATGGCTAATAGTACACGGTTT  |

**Table S3: Primer pairs used for qPCR in this study.**

For the indicated genomic loci sequences of the forward and reverse primers are indicated. PPIA primers are from a study by McClellan et al. (52).

Table S4

|           | Genes bound | EBNA2 co-bound |     |
|-----------|-------------|----------------|-----|
| EBNA3A    | 1731        | 600            | 35% |
| EBNA3B    | 2705        | 1340           | 50% |
| EBNA3C    | 3063        | 1081           | 35% |
| any EBNA3 | 5493        | 2014           | 37% |

**Table S4: Summary of the proportion of genes co-bound by EBNA3s and EBNA2 in LCLs.**

For this analysis we assigned each bound site summarized in Table S2 to the nearest Ensembl annotated gene, regardless of strand. When this distance was zero for both genes, we considered them both bound. The number of annotated genes bound by each EBNA3 is indicated in the first column, number with EBNA2 co-binding and % EBNA2 co-binding is indicated in columns two and three.

Figure S2

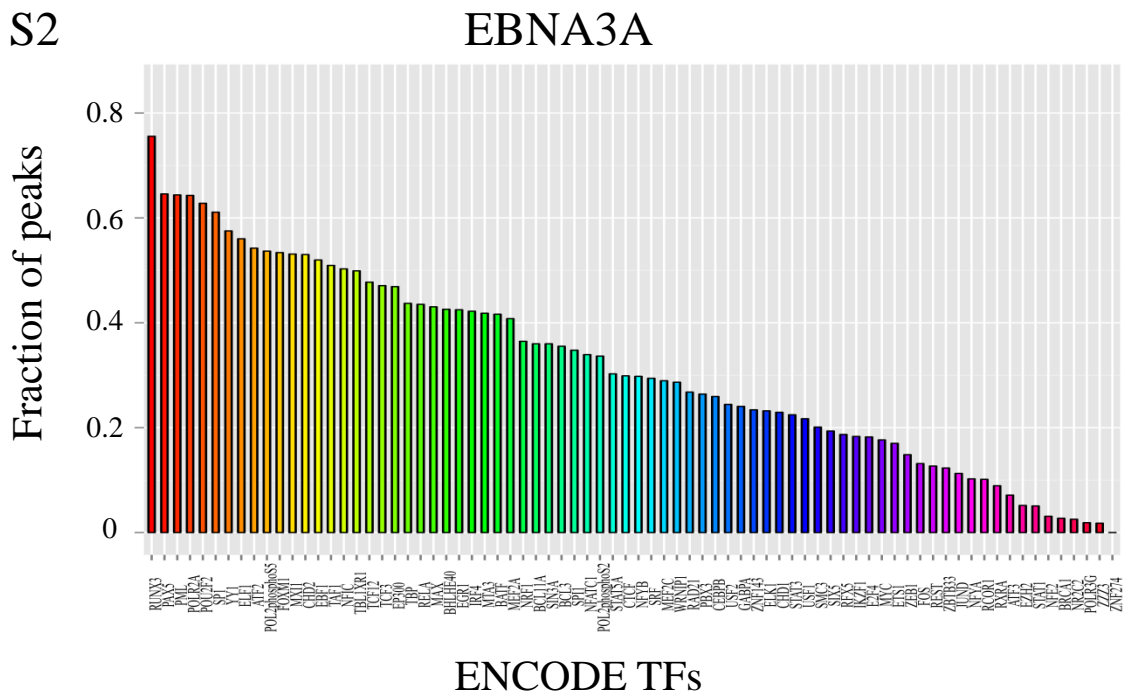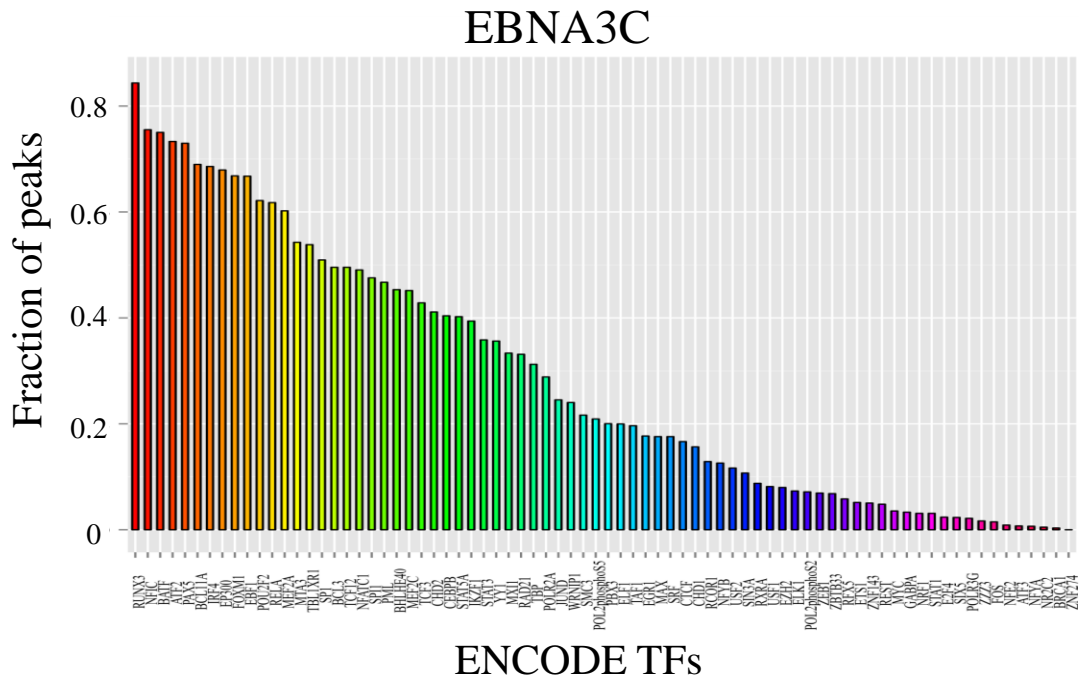

**Figure S2: Transcription factor co-binding at EBNA3A and EBNA3C bound sites.**

A) Bar plot showing the fraction of EBNA3A peaks co-associated with the indicated transcription factors (X-axis). Co-localization was defined as binding with 200 bp of EBNA3A bound sites and cell transcription factor binding locations were derived from ENCODE ChIP-seq data for 76 transcription factors in the GM12878 LCL. B) Bar plot as described for (A) showing the fraction of EBNA3C peaks co-associated with the indicated transcription factors.

Figure S3

| EBNA3A                                                                              |         |              |
|-------------------------------------------------------------------------------------|---------|--------------|
| Motif sequence                                                                      | P-value | Predicted TF |
|    | 3.2e-24 | EGR1         |
| EBNA3C                                                                              |         |              |
| Motif sequence                                                                      | P-value | Predicted TF |
|    | 1.2e-30 | —            |
|    | 2.3e-24 | AP1 family   |
|    | 6.0e-21 | EICE         |
|   | 1.2e-20 | IRF4         |
|  | 4.0e-20 | RUNX         |
|  | 3.7e-12 | ETS family   |

**Figure S3: Motif enrichment at EBNA3A and EBNA3C bound sites.**

EBNA3A or EBNA3C bound sites were analyzed for enriched motifs using MEME-ChIP. Motifs with the lowest p-values are indicated as well as any transcription factors predicted to recognize them.

# Figure S4

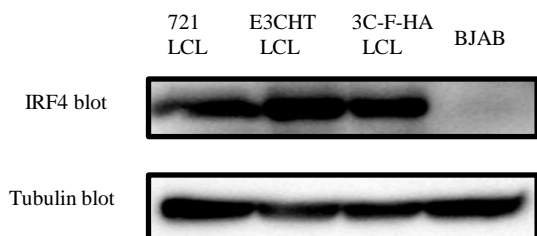

**Figure S4: Western blot for IRF4 expression levels in multiple B cell lines.** Western blots for IRF4 (top panel) and tubulin (bottom panel) were done on whole cell lysates from the indicated B cell lines to identify candidate cell lines lacking detectible IRF4 expression. Each lane represents whole cell lysates from  $10^6$  cells.

# Figure S5

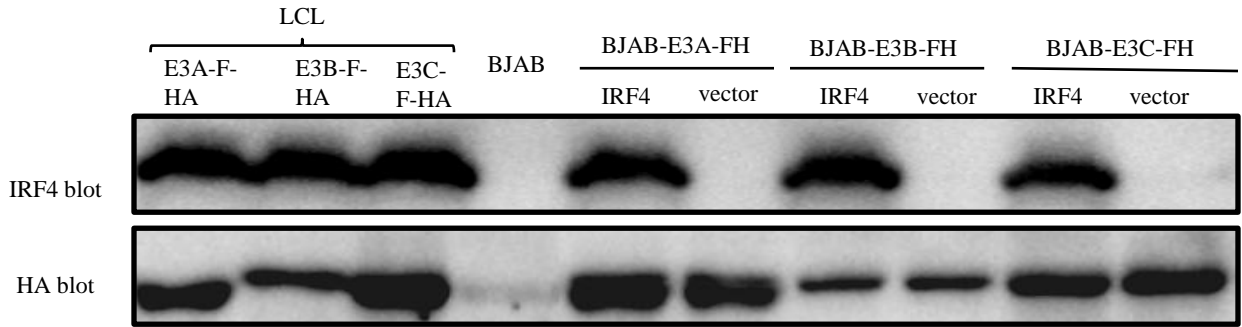

**Figure S5: Characterization of BJAB stably expressing flag-HA tagged EBNA3A, EBNA3B, or EBNA3C with or without IRF4.** Western blots for IRF4 (top panel) and HA (bottom panel) were done in BJAB clones expressing EBNA3A-FHA, EBNA3B-FHA, EBNA3C-FHA with either IRF4 or vector control. For comparison LCLs expressing EBNA3A-FHA, EBNA3B-FHA, EBNA3C-FHA are shown (left 3 lanes). Each lane represents whole cell lysate from  $10^6$  cells.
